# Supplementary material
Source: PubMed Central journal article supplement (PMC419523)
Supplement: pnas_101_21_7868__2.pdf [file pnas_101_21_7868__2.pdf]

|      | <b>NaCl<br/>FK506</b> | <b>NaCl<br/>FK506<br/>+<br/>SFK2</b> |
|------|-----------------------|--------------------------------------|
| ACS1 | 1.4                   | 8.9                                  |
| POT1 | 4.1                   | 24.2                                 |
| POX1 | -1.4                  | 2.5                                  |
| FAA2 | 1.5                   | 4.9                                  |
| FOX2 | 2.1                   | 5.8                                  |
| ECI1 | 2.6                   | 6.9                                  |
| DCI1 | 1.7                   | 4.1                                  |
